# Supplementary material
Source: PubMed Central journal article supplement (PMC4944663)
Supplement: mmc1.pdf [file mmc1.pdf]

**Biophysical Journal, Volume 111**

**Supplemental Information**

**Protein Composition Determines the Effect of Crowding on the Properties of Disordered Proteins**

**Cayla M. Miller, Young C. Kim, and Jeetain Mittal**

# **Supplementary Information for ” Protein composition determines effect of crowding on the properties of disordered proteins”**

Cayla M. Miller,<sup>†</sup> Young C. Kim,<sup>‡</sup> and Jeetain Mittal<sup>\*,†</sup>

*Department of Chemical and Biomolecular Engineering, Lehigh University, Bethlehem, PA  
18015, United States, and Center for Computational Materials Science, Naval Research  
Laboratory, Washington, D.C. 20375, United States*

E-mail: jeetain@lehigh.edu

---

\*To whom correspondence should be addressed

<sup>†</sup>Lehigh University

<sup>‡</sup>Naval Research Laboratory

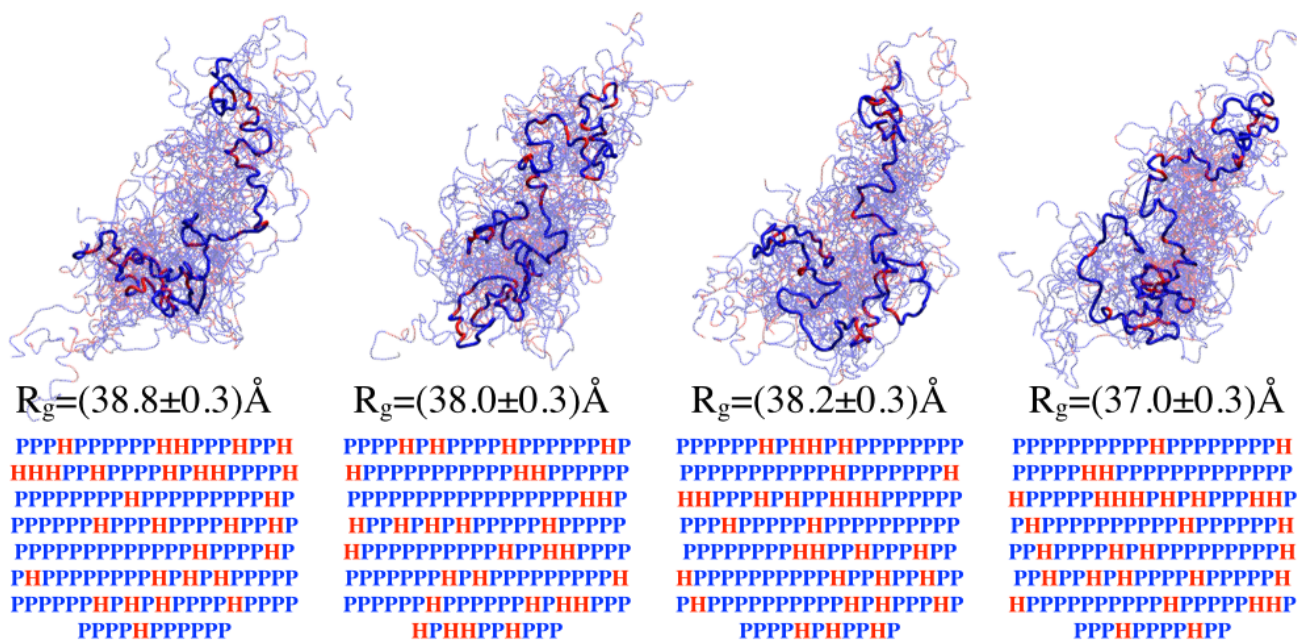

Figure 1: The four random sequences generated for  $\langle h \rangle = 0.2$  and  $N=150$ . Images show a representative snapshot of each sequence in bulk, as well as a representative ensemble of 15 conformations (transparent). In addition to the average  $R_g$  of each sequence's total ensemble, the letter sequence is shown, where H and P represent hydrophobic and hydrophilic (polar) residues, respectively.

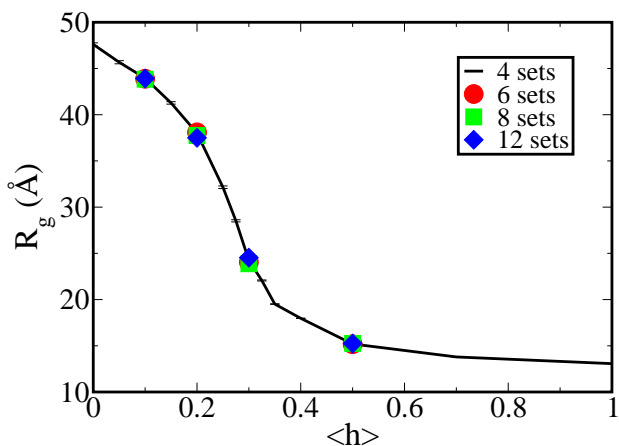

Figure 2:  $R_g$  vs.  $\langle h \rangle$  for the 150-mer IDP in bulk, comparing the results from varying numbers of sequences for  $\langle h \rangle = 0.1, 0.2, 0.3,$  and  $0.5$ . Each sequence is simulated for  $5E8$  steps.

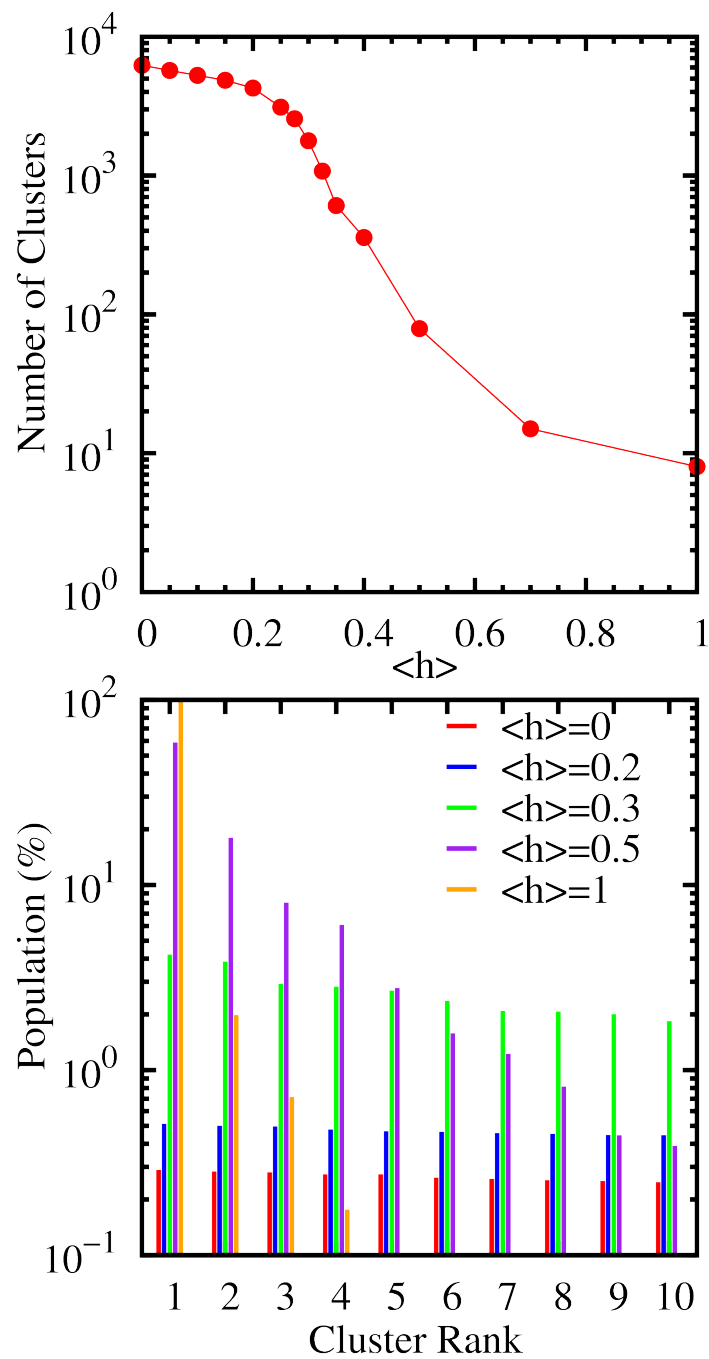

Figure 3: Number of clusters vs.  $\langle h \rangle$  for the 150-mer IDP in bulk (above). Population of top ten clusters for selected  $\langle h \rangle$  values (below).

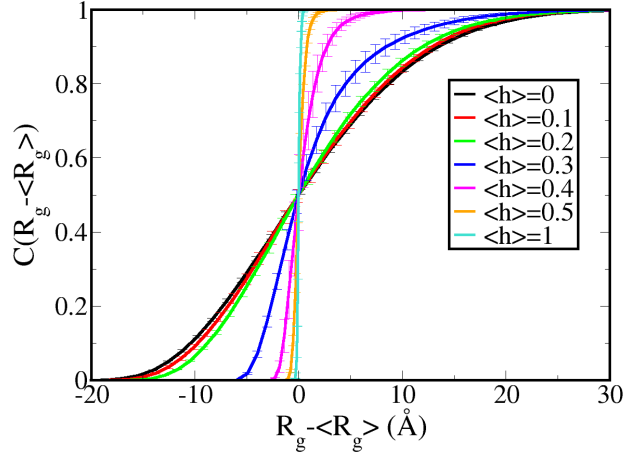

Figure 4: Cumulative  $R_g$  distributions shifted by the the median value for IDPs of varying  $\langle h \rangle$  in bulk.

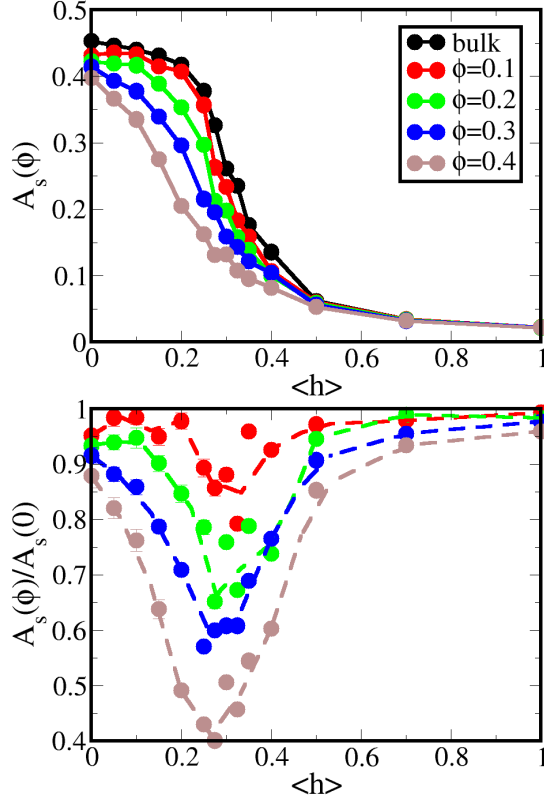

Figure 5: Average asphericity,  $A_s$ , of the IDPs as a function of  $\langle h \rangle$  shows the same trend as  $R_g$  in crowders. Above,  $A_s$  in bulk ranges from 0.45 at  $\langle h \rangle = 0$  to 0.022 at  $\langle h \rangle = 1$ , while crowding reduces the asphericity, particularly for  $\langle h \rangle \approx 0.25$ . Scaling  $A_s$  by that in bulk (below) shows a non-monotonic collapse, similar to that seen in the  $R_g$  (see main text Figure 2). Data shown is for  $r_c = 13 \text{ \AA}$ .

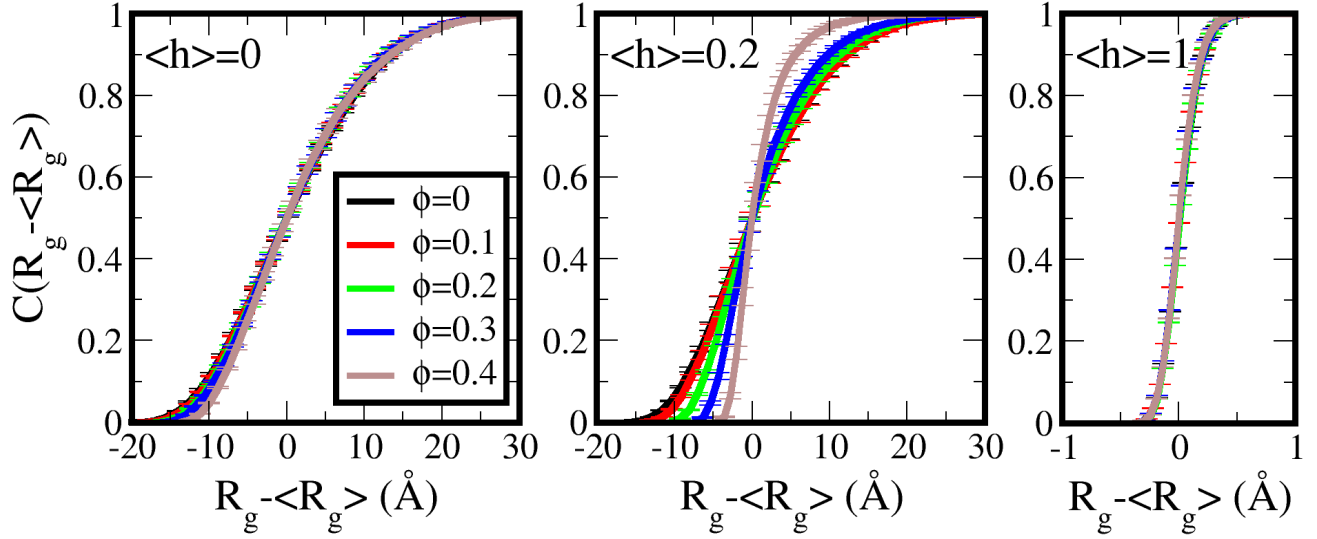

Figure 6: Cumulative  $R_g$  distributions shifted by the the median value for  $\langle h \rangle = 0, 0.2,$  and  $1$  in bulk (black) and in crowders of radius  $r_c = 13$  Å.

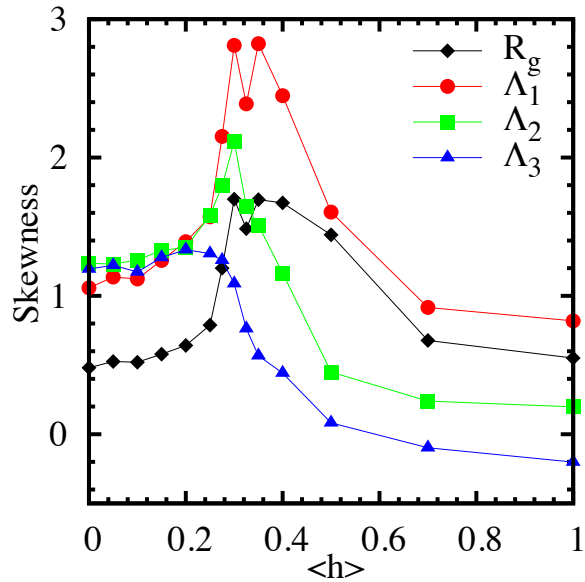

Figure 7: Skewness of the  $R_g$  distribution (black diamonds) as well as the three eigenvalues of the gyration tensor ( $\Lambda_1, \Lambda_2, \Lambda_3$ ) vs.  $\langle h \rangle$ , showing a maximum at intermediate  $\langle h \rangle$  values.

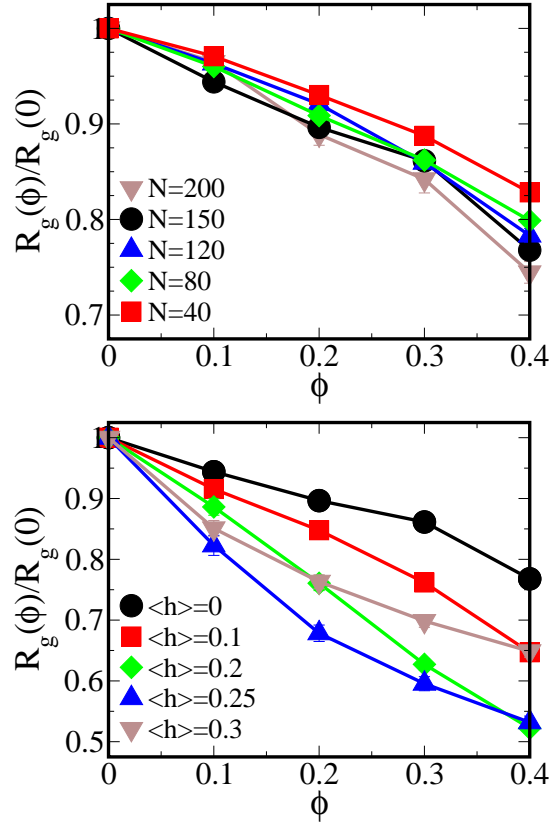

Figure 8:  $R_g(\phi)$  of the IDP chain within crowders scaled by that in bulk for varying for  $N$  and  $\langle h \rangle$ , while the size of the polymer relative to the crowders ( $R_g(0)/r_c$ ) is maintained at 3.66. Above, the IDP length ( $N$ ) is varied for the fully hydrophilic ( $\langle h \rangle = 0$ ) chain, and  $r_c$  is manipulated to maintain the same polymer-to-crowder size ratio. Below, the  $r_c$  is again manipulated while  $N$  is held constant at 150 and changes in bulk  $R_g$  are effected by varying  $\langle h \rangle$ .

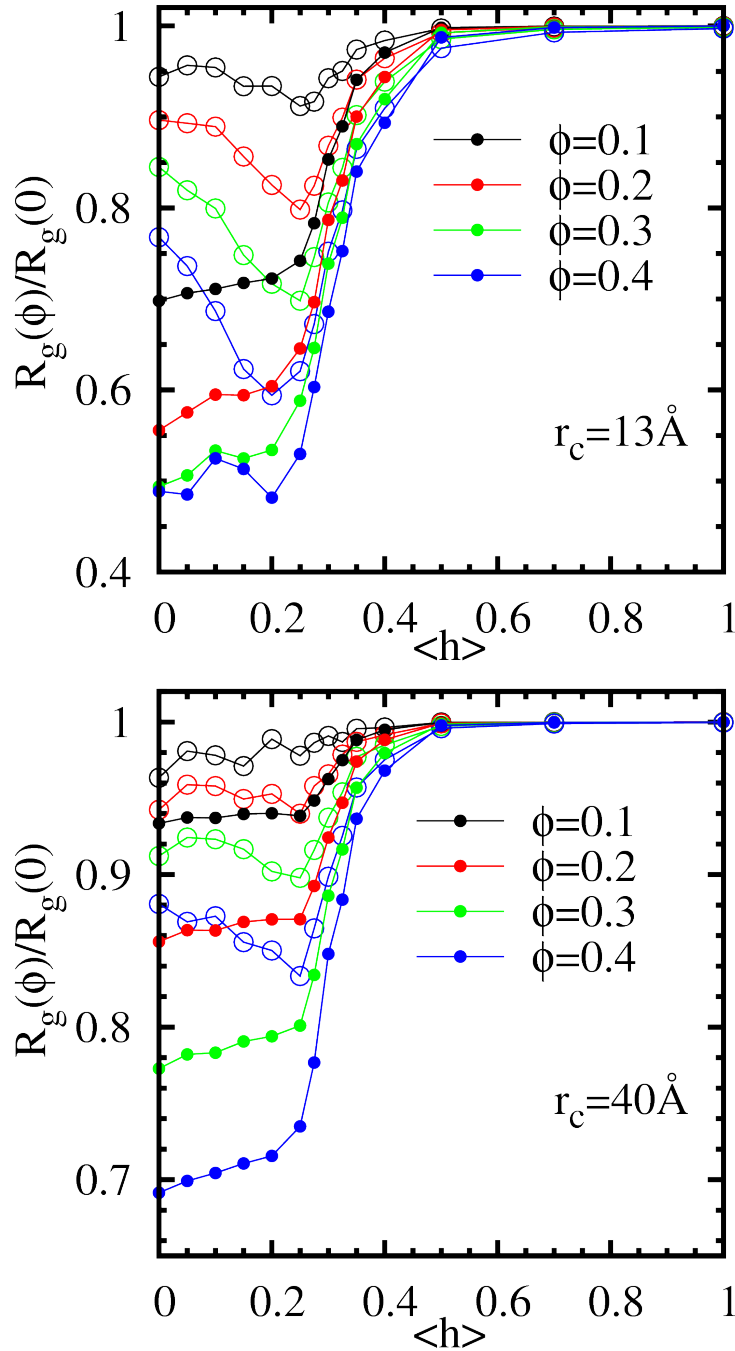

Figure 9:  $R_g(\phi)/R_g(0)$  for our 150-mer IDP polymers (open symbols) and the corresponding predictions by the ellipsoid model with free-volume theory (solid symbols) with a scaling factor  $s = 1$ . The simulation results are compared with theoretical predictions for  $r_c = 13 \text{ \AA}$  (above) and  $40 \text{ \AA}$  (below), at crowding volume fractions  $\phi = 0.1 - 0.4$ .



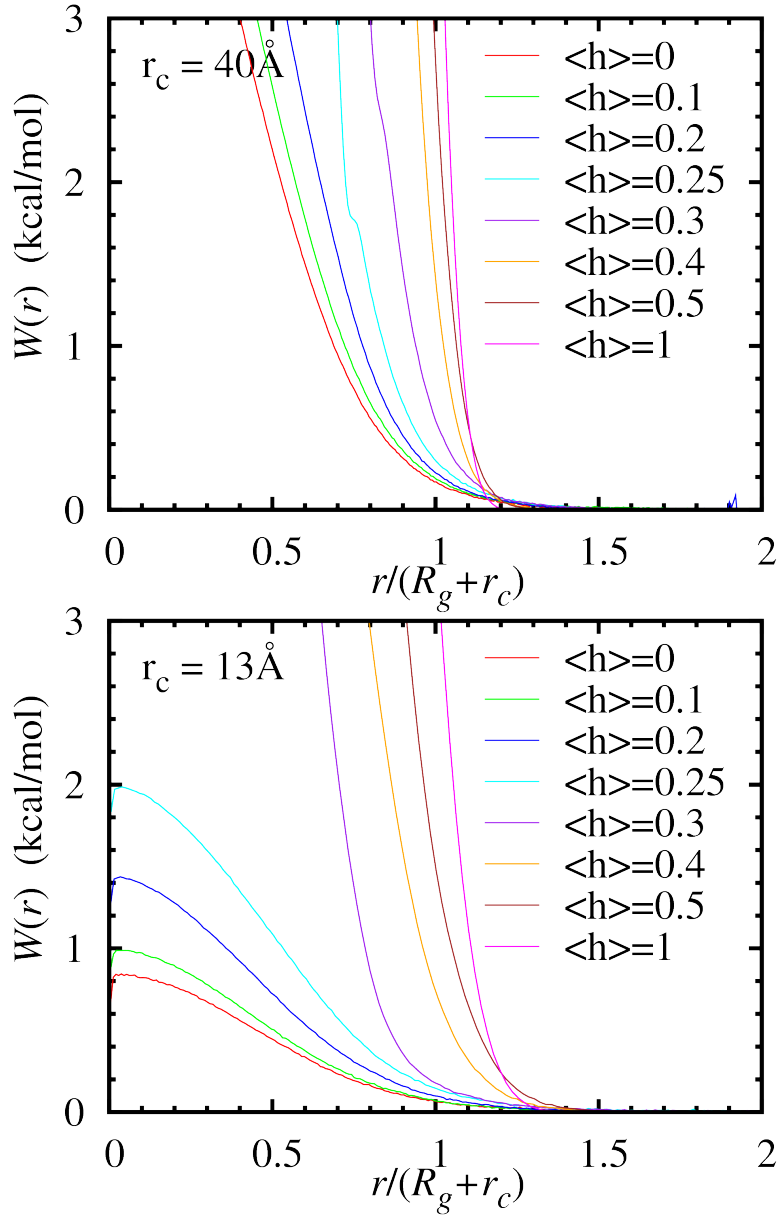

Figure 10: Potential of mean force between a protein chain and a spherical crowder of radius  $13 \text{ \AA}$  (above) and  $40 \text{ \AA}$  (below) for different  $\langle h \rangle$  values.

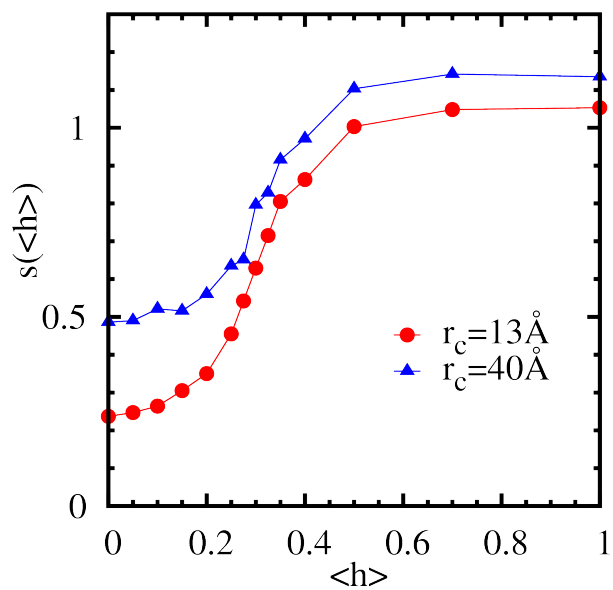

Figure 11: Scaling factor for the principal radii of ellipsoids vs.  $\langle h \rangle$  at  $r_c = 13$  and  $40 \text{ \AA}$ .
